# Supplementary material for: RAG and HMGB1 create a large bend in the 23RSS in the V(D)J recombination synaptic complexes
Source: PubMed Central journal article supplement — Nucleic Acids Res. 2013 Jan 3;41(4):2437–54. doi: 10.1093/nar/gks1294 (PMC3575807; doi:10.1093/nar/gks1294), 2013-01-03
Supplement: supp_gks1294_nar-02361-h-2012-File010.pdf [file supp_gks1294_nar-02361-h-2012-File010.pdf]

# 23RSS

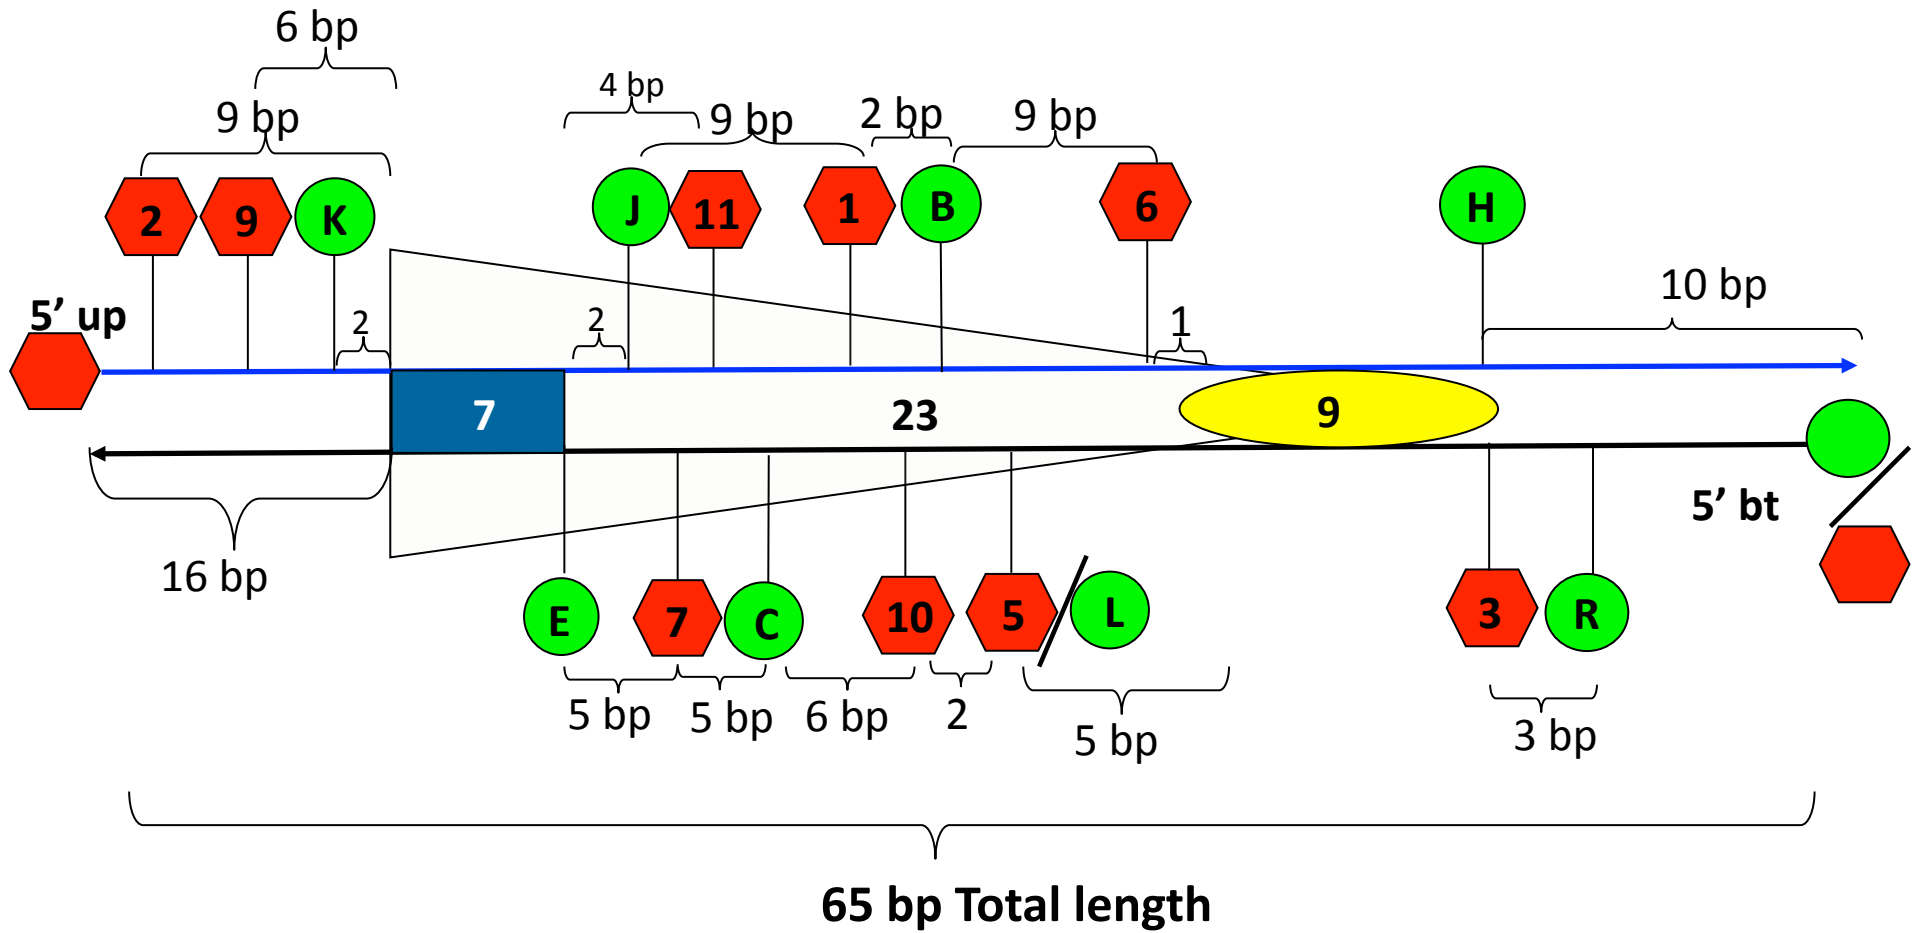

Fig. S1

● = FAM

⬡ = TAMRA

**Figure S1.** Location of the fluorophore-labeling positions used in this study. Donor labeling positions (green) are designated with a letter, and acceptor labeling positions (red) are designated with a number, while labels at the 5' ends of the two DNA strands are indicated as 5' up for the top strand and 5' bt for the bottom strand.

Fig. S2

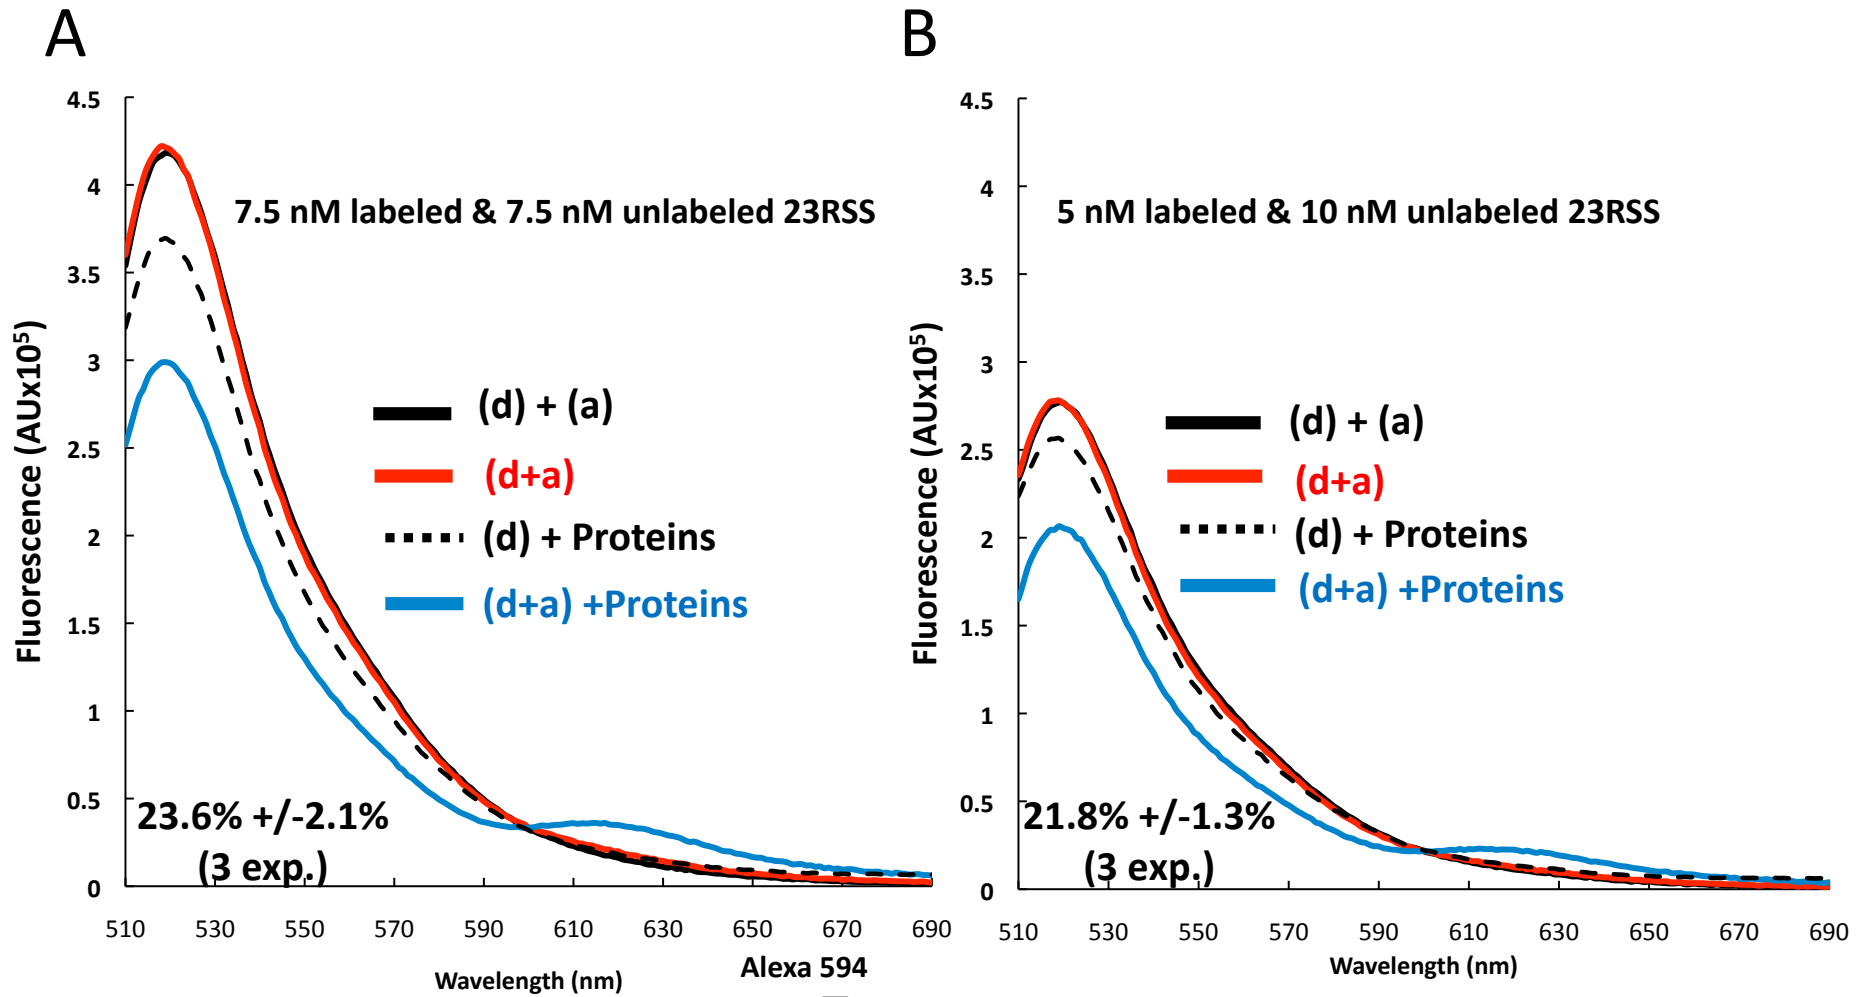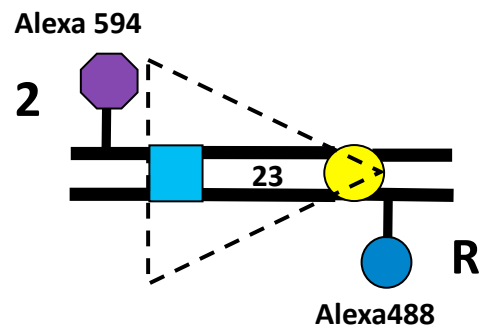

**Figure S2.** Analysis of energy transfer when the 23RSS<sub>d</sub>R2<sub>a</sub> substrate is diluted with unlabeled 23RSS. FRET experiments were performed as in Fig. 2E (co-expressed MBP-RAG1c and MBP-RAG2c proteins) but instead of 15 nM 23RSS<sub>d</sub>R2<sub>a</sub> substrate as in Fig. 2E, 7.5 nM 23RSS<sub>d</sub>R2<sub>a</sub> substrate and 7.5 nM unlabeled 23RSS (A), or 5 nM 23RSS<sub>d</sub>R2<sub>a</sub> substrate and 10 nM unlabeled 23RSS (B) were used. Data are displayed as in Fig. 2E. Robust energy transfer is detected even after dilution of the labeled substrate, strongly arguing against a major contribution of energy transfer between different 23RSS molecules (in *trans*).

# Nonamer Intrinsic Bend

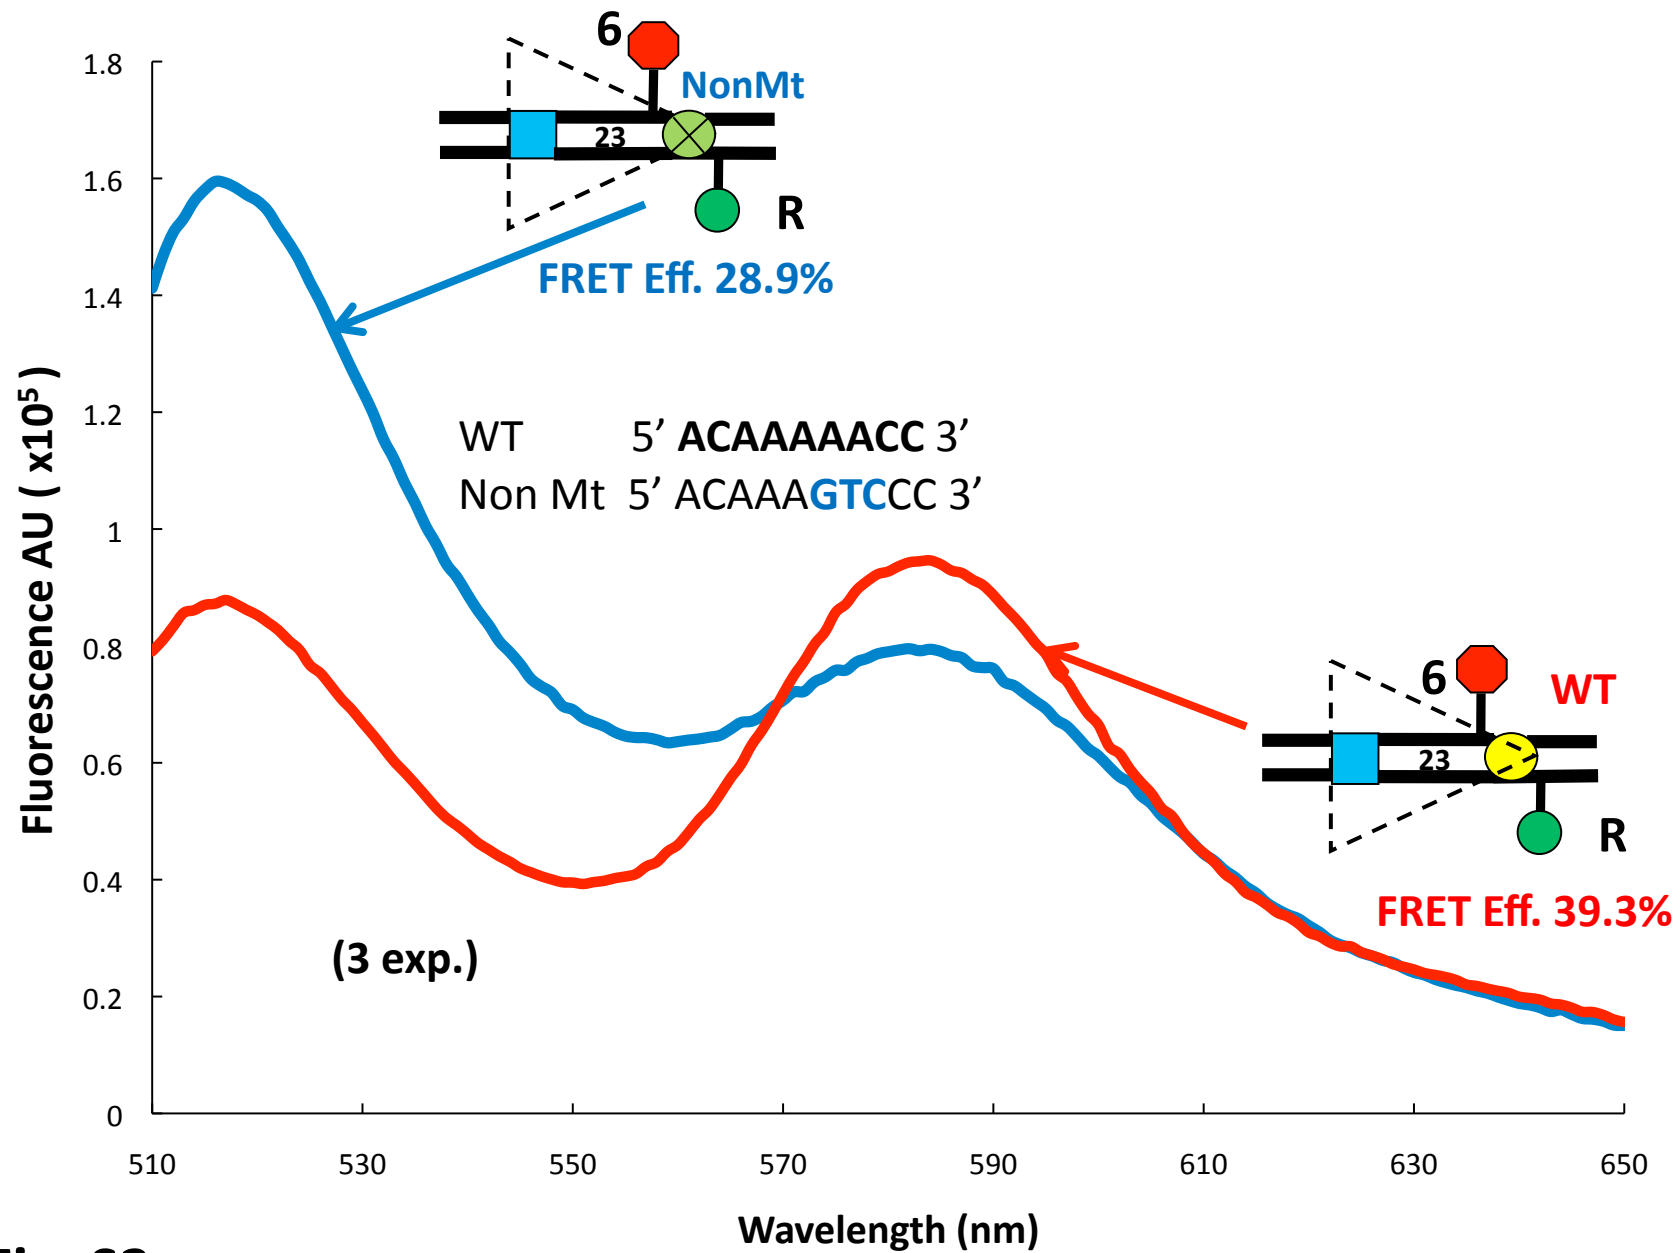

Fig. S3

**Figure S3.** Evidence for an intrinsic bend in the 23RSS nonamer. Emission spectra are shown for the 23RSS<sub>d</sub>R6<sub>a</sub> substrate (red) and the 23RSS<sub>d</sub>R6<sub>a</sub> NonMt substrate (blue) in which three bp in the A<sub>5</sub> tract of the nonamer have been mutated, as indicated. The fluorophores in this substrate are positioned so that the predicted intrinsic bend associated with an A<sub>5</sub> tract (36) would bring them closer together. The decrease in E-FRET observed in the 23RSS<sub>d</sub>R6<sub>a</sub> NonMt substrate as compared to the 23RSS<sub>d</sub>R6<sub>a</sub> substrate, while not statistically significant (P=0.25), is consistent with a loss of this intrinsic bend as a consequence of disrupting the A<sub>5</sub> tract.
